# Supplementary figures and images for: Highly sensitive and selective toluene sensor based on Ce-doped coral-like SnO2
Source: Royal Society of Chemistry journal article supplement (doi:10.1039/c4ra12315h), 2015-01-01

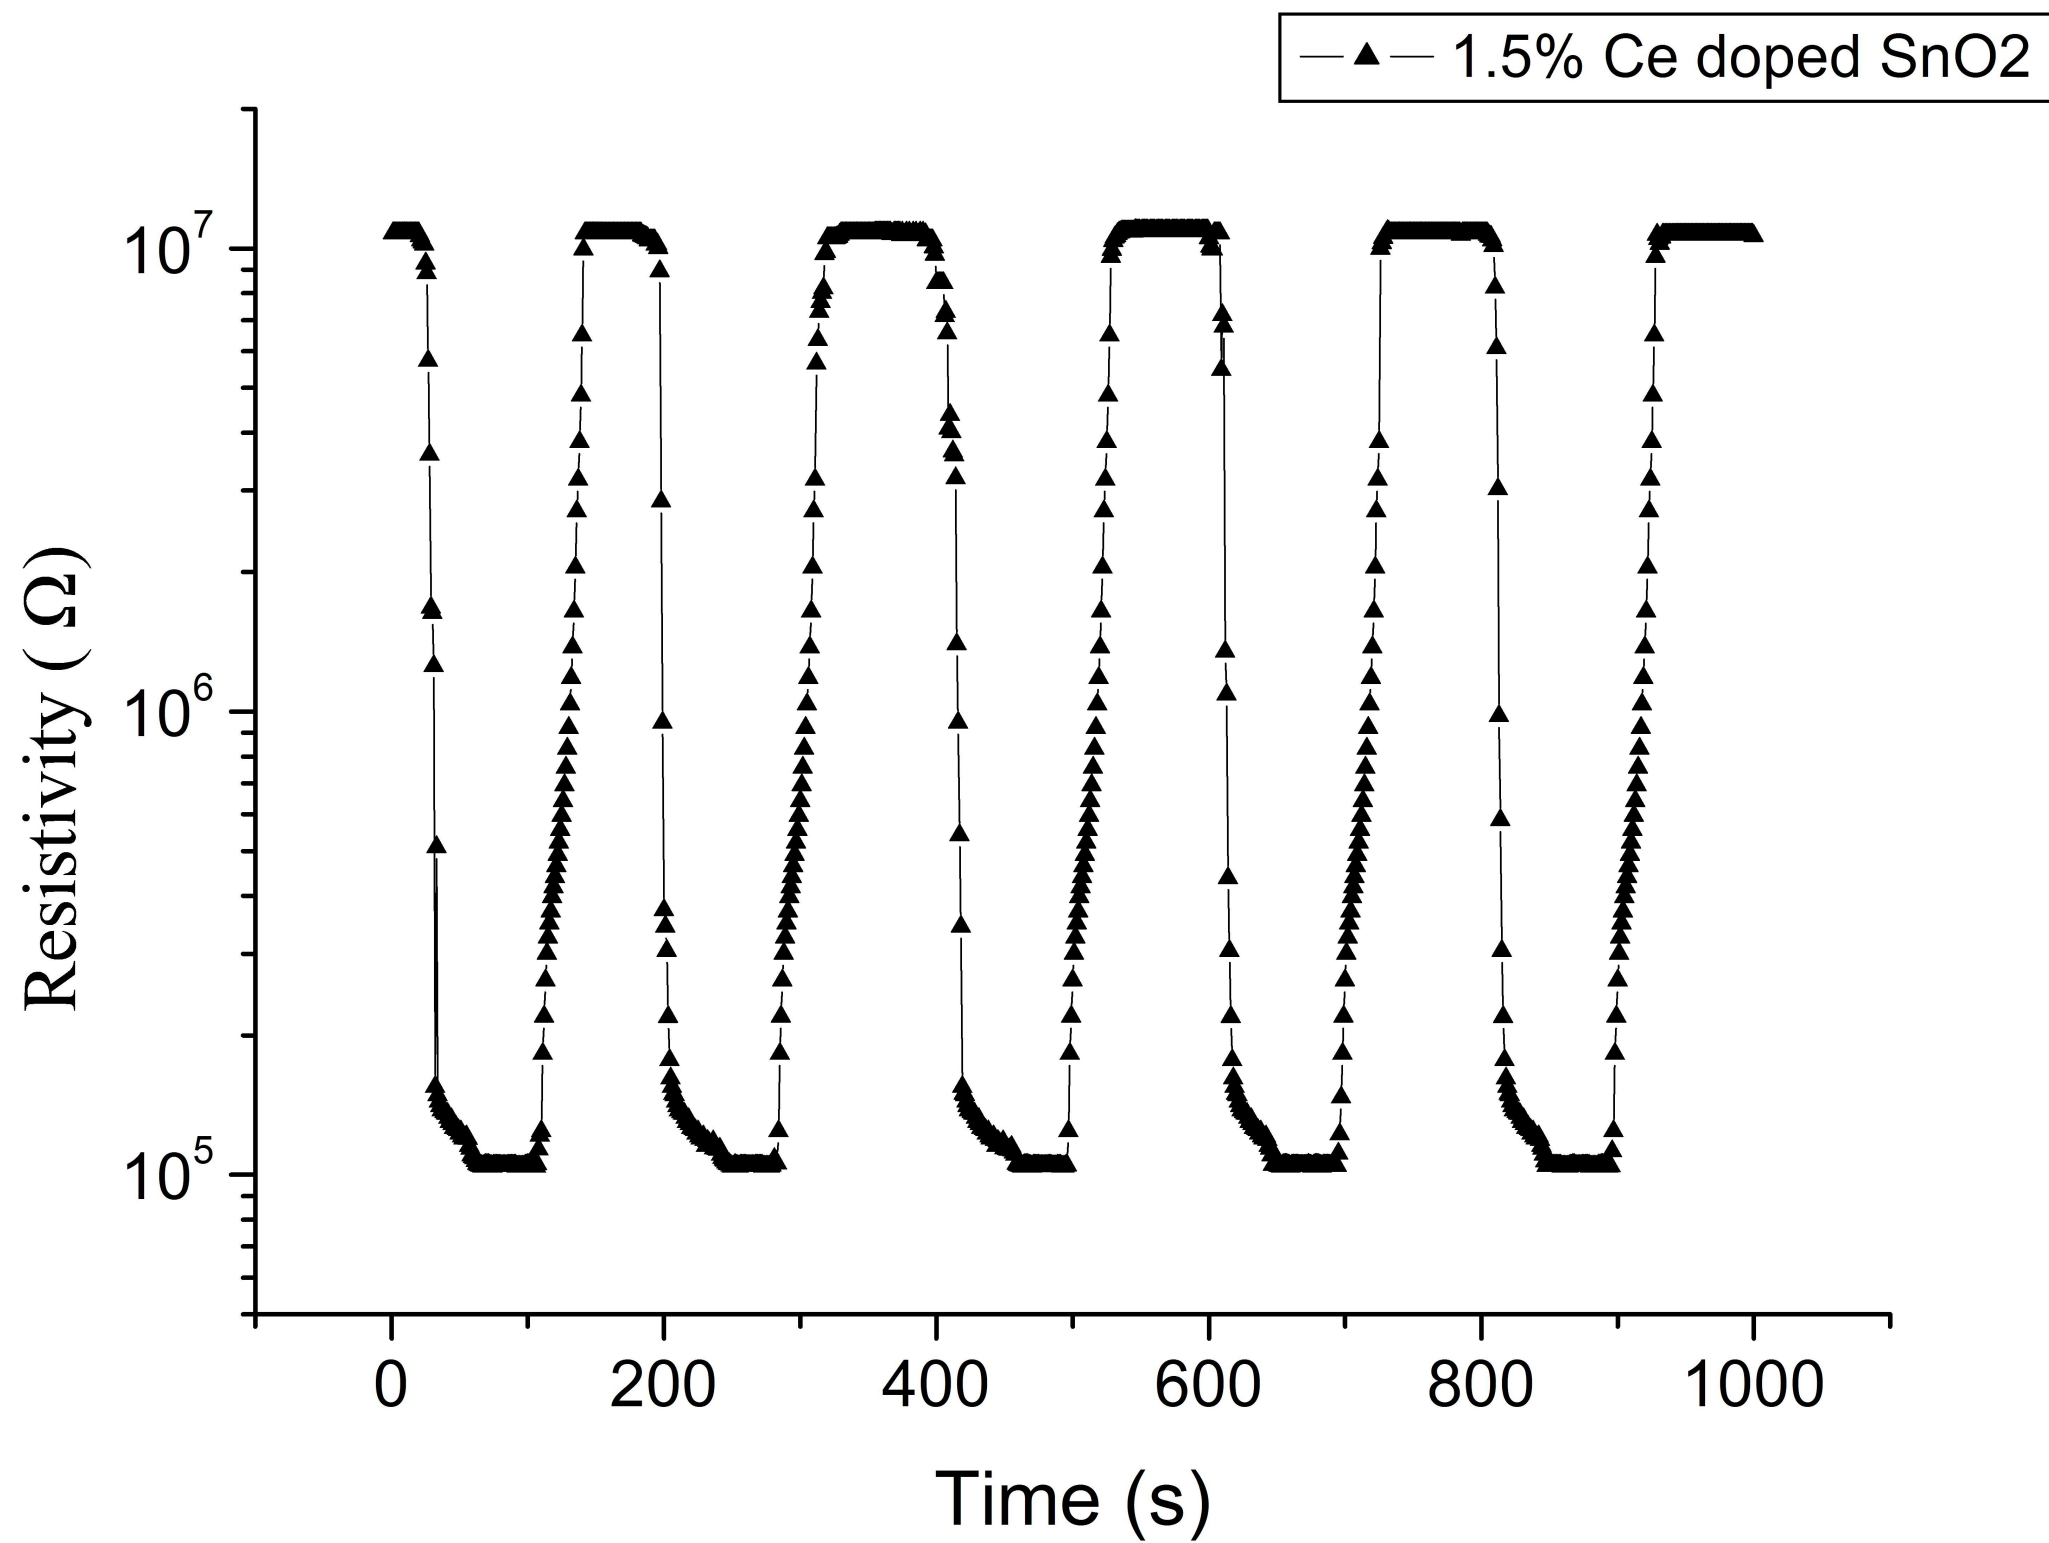

Supplement: c4ra12315h2.pdf [file c4ra12315h2.pdf]
